# Supplementary material for: Broad-Spectrum Salmonella Phages PSE-D1 and PST-H1 Controls Salmonella in Foods
Source: MDPI journal article supplement (doi:10.3390/v14122647), 2022-11-27
Supplement: s1 [file s1]

**Table S1.** CDS function prediction of phage PSE-D1.

| C<br>DS | Hit_name           | Hit_description                                                  | Length<br>(aa) | Strand | Identity<br>(%) | Value     |
|---------|--------------------|------------------------------------------------------------------|----------------|--------|-----------------|-----------|
| 1       | WP_1539322<br>47.1 | hypothetical protein [Klebsiella pneumoniae]                     | 297            | -      | 100.00%         | 0.00E+00  |
| 2       | UNY41078.1         | rIIB lysis inhibitor protein [Klebsiella phage KP182]            | 912            | -      | 100.00%         | 1.00E-176 |
| 3       | QLF83147.1         | rIIA lysis inhibitor [Klebsiella phage KpnM6E1]                  | 2169           | -      | 99.45%          | 0.00E+00  |
| 4       | YP_0100893<br>07.1 | rIIA lysis inhibitor [Klebsiella phage KPV15]                    | 207            | -      | 97.06%          | 2.00E-25  |
| 5       | QQM14529.<br>1     | hypothetical protein [Klebsiella phage<br>vB_KpnM_17-11]         | 153            | -      | 98.00%          | 2.00E-27  |
| 6       | UJP30193.1         | DNA topoisomerase large subunit [Klebsiella phage<br>Kpn6N]      | 1839           | -      | 99.67%          | 0.00E+00  |
| 7       | UMM76775.<br>1     | hypothetical protein [Klebsiella phage UTI-K1]                   | 369            | -      | 96.72%          | 5.00E-80  |
| 8       | AUV57630.1         | hypothetical protein [Klebsiella phage KP1]                      | 249            | -      | 98.78%          | 3.00E-52  |
| 9       | QQM14524.<br>1     | hypothetical protein [Klebsiella phage<br>vB_KpnM_17-11]         | 177            | -      | 89.66%          | 9.00E-31  |
| 10      | QQM14523.<br>1     | hypothetical protein [Klebsiella phage<br>vB_KpnM_17-11]         | 336            | -      | 99.10%          | 1.00E-76  |
| 11      | UMM76780.<br>1     | hypothetical protein [Klebsiella phage UTI-K1]                   | 366            | -      | 99.17%          | 1.00E-75  |
| 12      | UMM77060.<br>1     | hypothetical protein [Klebsiella phage UTI-K4]                   | 216            | -      | 98.59%          | 6.00E-44  |
| 13      | UMM76782.<br>1     | hypothetical protein [Klebsiella phage UTI-K1]                   | 441            | -      | 98.63%          | 3.00E-99  |
| 14      | UMM77062.<br>1     | hypothetical protein [Klebsiella phage UTI-K4]                   | 168            | -      | 100.00%         | 1.00E-18  |
| 15      | QPB09025.1         | DexA-like exonuclease [Klebsiella phage<br>Metamorpho]           | 690            | -      | 96.07%          | 1.00E-144 |
| 16      | UJP30204.1         | hypothetical protein [Klebsiella phage Kpn6N]                    | 255            | -      | 97.62%          | 6.00E-53  |
| 17      | UYE90552.1         | DNA helicase [Klebsiella phage pKp20]                            | 1332           | -      | 99.32%          | 0.00E+00  |
| 18      | QLF82884.1         | hypothetical protein KpnM6E1_gp001 [Klebsiella<br>phage KpnM6E1] | 315            | -      | 99.04%          | 2.00E-70  |
| 19      | QGF21434.1         | anti-termination [Klebsiella phage JIPh_Kp122]                   | 756            | -      | 100.00%         | 6.00E-173 |
| 20      | YP_0100893<br>24.1 | NAD--protein ADP-ribosyltransferase [Klebsiella<br>phage KPV15]  | 690            | -      | 99.56%          | 3.00E-170 |
| 21      | UOK17627.1         | molybdenum ABC transporter [Klebsiella phage]                    | 189            | -      | 96.67%          | 7.00E-1   |

|    |                |                                                                             |      |   |         |               |
|----|----------------|-----------------------------------------------------------------------------|------|---|---------|---------------|
|    |                | KP1079]                                                                     |      |   |         | 0             |
| 22 | UNY41100.1     | hypothetical protein [Klebsiella phage KP185]                               | 510  | - | 98.22%  | 6.00E-1<br>22 |
| 23 | UWG89310.1     | hypothetical protein [Bacteriophage sp.]                                    | 192  | - | 98.41%  | 7.00E-2<br>6  |
| 24 | QGF21439.1     | capsid and scaffold protein [Klebsiella phage JIPh_Kp122]                   | 228  | - | 97.33%  | 5.00E-3<br>3  |
| 25 | UMM76510.1     | hypothetical protein [Klebsiella phage UTI-K1]                              | 138  | - | 88.46%  | 8.00E-0<br>5  |
| 26 | YP_009190590.1 | dCTP pyrophosphatase [Klebsiella phage JD18]                                | 522  | - | 100.00% | 5.00E-1<br>25 |
| 27 | YP_010089331.1 | hypothetical protein KNT59_gp050 [Klebsiella phage KPV15]                   | 192  | + | 98.41%  | 4.00E-3<br>7  |
| 28 | UGO53187.1     | putative DNA primase/DNA helicase [Klebsiella phage vB_KaeM_Nispero]        | 1023 | - | 99.12%  | 0.00E+<br>00  |
| 29 | YP_009190593.1 | hypothetical protein AU097_gp012 [Klebsiella phage JD18]                    | 165  | - | 97.56%  | 2.00E-1<br>9  |
| 30 | AUV57372.1     | hypothetical protein [Klebsiella phage KP1]                                 | 210  | - | 98.55%  | 6.00E-4<br>3  |
| 31 | YP_010096006.1 | spackle periplasmic protein [Klebsiella phage Mineola]                      | 294  | - | 100.00% | 4.00E-6<br>4  |
| 32 | UGO49665.1     | putative DNA primase/helicase [Klebsiella phage vB_KaeM_Merci]              | 1440 | - | 100.00% | 0.00E+<br>00  |
| 33 | YP_010098647.1 | capsid and scaffold protein [Klebsiella phage KP179]                        | 351  | - | 99.14%  | 2.00E-7<br>6  |
| 34 | UJP30223.1     | recombination protein [Klebsiella phage Kpn6N]                              | 1176 | - | 99.74%  | 0.00E+<br>00  |
| 35 | AUV57378.1     | hypothetical protein [Klebsiella phage KP1]                                 | 222  | - | 98.63%  | 8.00E-4<br>6  |
| 36 | QQM14496.1     | glucosyltransferase [Klebsiella phage vB_KpnM_17-11]                        | 837  | - | 99.28%  | 0.00E+<br>00  |
| 37 | QSJ03771.1     | deoxycytidylate 5-hydroxymethyltransferase [Clostridium phage HZhang-2021a] | 735  | - | 78.37%  | 2.00E-1<br>39 |
| 38 | OHB25415.1     | hypothetical protein KNT59_gp062 [Klebsiella phage KPV15]                   | 207  | - | 54.35%  | 1.00E-0<br>9  |
| 39 | UNY41120.1     | hypothetical protein [Klebsiella phage KP185]                               | 444  | - | 98.64%  | 7.00E-1<br>03 |
| 40 | QEG11007.1     | DNA polymerase [Klebsiella phage KMI12]                                     | 2709 | - | 99.78%  | 0.00E+<br>00  |
| 41 | YP_009190607.1 | translational repressor RegA [Klebsiella phage JD18]                        | 372  | - | 100.00% | 2.00E-8<br>5  |
| 42 | YP_009190608.1 | DNA polymerase clamp loader subunit Gp62 [Klebsiella phage JD18]            | 567  | - | 100.00% | 1.00E-1<br>21 |
| 43 | UJP30232.1     | replication factor C small subunit / DNA polymerase                         | 963  | - | 99.69%  | 0.00E+        |

|    |                |                                                                        |      |   |         |           |
|----|----------------|------------------------------------------------------------------------|------|---|---------|-----------|
|    |                | clamp loader subunit [Klebsiella phage Kpn6N]                          |      |   |         | 00        |
| 44 | AUV57388.1     | sliding clamp, DNA polymerase accessory protein [Klebsiella phage KP1] | 702  | - | 99.57%  | 2.00E-167 |
| 45 | YP_009836769.1 | RNA polymerase [Klebsiella phage vB_Kpn_F48]                           | 378  | - | 70.73%  | 3.00E-56  |
| 46 | QEG11811.1     | hypothetical protein KPN6_151 [Klebsiella phage KPN6]                  | 195  | - | 98.44%  | 1.00E-39  |
| 47 | AUV57391.1     | recombination-related endonuclease [Klebsiella phage KP1]              | 1683 | - | 99.46%  | 0.00E+00  |
| 48 | UNY41129.1     | recombination-related endonuclease [Klebsiella phage KP185]            | 1023 | - | 92.35%  | 0.00E+00  |
| 49 | QGF21466.1     | alpha glucosyl transferase [Klebsiella phage JIPh_Kp122]               | 1197 | - | 99.25%  | 0.00E+00  |
| 50 | UCR74262.1     | hypothetical protein [Klebsiella phage vB_KpnM_5N]                     | 258  | - | 96.47%  | 9.00E-55  |
| 51 | UJP30240.1     | hypothetical protein [Klebsiella phage Kpn6N]                          | 198  | - | 96.92%  | 7.00E-39  |
| 52 | UCR74264.1     | hypothetical protein [Klebsiella phage vB_KpnM_5N]                     | 303  | - | 97.00%  | 8.00E-65  |
| 53 | YP_010098626.1 | hypothetical protein KNU12_gp186 [Klebsiella phage KP179]              | 141  | - | 100.00% | 6.00E-25  |
| 54 | YP_009190621.1 | RNA polymerase subunit sigma [Klebsiella phage JD18]                   | 549  | - | 100.00% | 1.00E-133 |
| 55 | AUV57399.1     | hypothetical protein [Klebsiella phage KP1]                            | 246  | - | 98.77%  | 2.00E-52  |
| 56 | AUV57400.1     | hypothetical protein [Klebsiella phage KP1]                            | 279  | - | 97.83%  | 2.00E-58  |
| 57 | QQM14474.1     | hypothetical protein [Klebsiella phage vB_KpnM_17-11]                  | 225  | - | 98.65%  | 6.00E-45  |
| 58 | AUV57402.1     | hypothetical protein [Klebsiella phage KP1]                            | 285  | - | 98.94%  | 4.00E-61  |
| 59 | UMM76829.1     | hypothetical protein [Klebsiella phage UTI-K4]                         | 258  | - | 94.12%  | 8.00E-52  |
| 60 | CAD5242042.1   | phage protein [Klebsiella phage vB_KpM-Wobble]                         | 333  | - | 99.09%  | 5.00E-73  |
| 61 | AUV57405.1     | hypothetical protein [Klebsiella phage KP1]                            | 243  | - | 98.75%  | 1.00E-51  |
| 62 | AUV57406.1     | hypothetical protein [Klebsiella phage KP1]                            | 189  | - | 95.16%  | 9.00E-37  |
| 63 | YP_009289484.1 | glutaredoxin [Klebsiella phage PKO111]                                 | 303  | - | 100.00% | 9.00E-66  |
| 64 | AUV57408.1     | hypothetical protein [Klebsiella phage KP1]                            | 342  | - | 99.12%  | 2.00E-75  |
| 65 | AUV57409.1     | hypothetical protein [Klebsiella phage KP1]                            | 213  | - | 98.57%  | 2.00E-45  |

|    |                |                                                                                                 |      |   |         |           |
|----|----------------|-------------------------------------------------------------------------------------------------|------|---|---------|-----------|
|    |                |                                                                                                 |      |   |         | 0         |
| 66 | QQM14466.1     | hypothetical protein [Klebsiella phage vB_KpnM_17-11]                                           | 117  | - | 96.88%  | 0.00E+00  |
| 67 | UMM76837.1     | ribonucleotide reductase of class III (anaerobic), activating protein [Klebsiella phage UTI-K4] | 471  | - | 99.36%  | 0.00E+00  |
| 68 | UJP30256.1     | hypothetical protein [Klebsiella phage Kpn6N]                                                   | 219  | - | 97.22%  | 3.00E-44  |
| 69 | QEG11487.1     | ribonucleotide reductase of class III (anaerobic) [Klebsiella phage KMI13]                      | 1839 | - | 100.00% | 0.00E+00  |
| 70 | YP_009289480.1 | endonuclease VII [Klebsiella phage PKO111]                                                      | 474  | - | 99.36%  | 0.00E+00  |
| 71 | UMM76559.1     | hypothetical protein [Klebsiella phage UTI-K1]                                                  | 309  | - | 96.08%  | 1.00E-66  |
| 72 | YP_010089383.1 | pin protease inhibitor [Klebsiella phage KPV15]                                                 | 453  | - | 96.00%  | 4.00E-101 |
| 73 | QYN80518.1     | hypothetical protein [Kosakonia phage Kc304]                                                    | 159  | - | 65.85%  | 0.00E+00  |
| 74 | QGF21489.1     | nucleotide reductase subunit C [Klebsiella phage JIPh_Kp122]                                    | 390  | - | 99.22%  | 0.00E+00  |
| 75 | YP_010089386.1 | hypothetical protein KNT59_gp105 [Klebsiella phage KPV15]                                       | 171  | - | 96.43%  | 0.00E+00  |
| 76 | UJP30265.1     | hypothetical protein [Klebsiella phage Kpn6N]                                                   | 189  | - | 98.39%  | 0.00E+00  |
| 77 | YP_010098603.1 | glutaredoxin [Klebsiella phage KP179]                                                           | 270  | - | 97.75%  | 0.00E+00  |
| 78 | UJP30267.1     | hypothetical protein [Klebsiella phage Kpn6N]                                                   | 291  | - | 97.92%  | 0.00E+00  |
| 79 | UMM76850.1     | hypothetical protein [Klebsiella phage UTI-K4]                                                  | 159  | - | 96.15%  | 0.00E+00  |
| 80 | UMM76851.1     | hypothetical protein [Klebsiella phage UTI-K4]                                                  | 510  | - | 84.62%  | 0.00E+00  |
| 81 | UJP30270.1     | hypothetical protein [Klebsiella phage Kpn6N]                                                   | 333  | - | 99.09%  | 1.00E+00  |
| 82 | UNY41164.1     | hypothetical protein [Klebsiella phage KP185]                                                   | 315  | - | 98.08%  | 2.00E+00  |
| 83 | UNY41165.1     | thioredoxin [Klebsiella phage KP185]                                                            | 237  | - | 98.72%  | 3.00E+00  |
| 84 | AUV57426.1     | hypothetical protein [Klebsiella phage KP1]                                                     | 975  | - | 98.46%  | 4.00E+00  |
| 85 | YP_010089397.1 | hypothetical protein KNT59_gp116 [Klebsiella phage KPV15]                                       | 789  | - | 99.62%  | 5.00E+00  |
| 86 | UMM76574.1     | hypothetical protein [Klebsiella phage UTI-K1]                                                  | 195  | - | 98.44%  | 3.00E-37  |
| 87 | UMM76575.1     | hypothetical protein [Klebsiella phage UTI-K1]                                                  | 165  | - | 98.15%  | 4.00E-3   |

|     |                    |                                                                          |      |   |         |         |
|-----|--------------------|--------------------------------------------------------------------------|------|---|---------|---------|
|     | 1                  |                                                                          |      |   |         | 0       |
| 88  | YP_0091906<br>56.1 | hypothetical protein AU097_gp075 [Klebsiella phage<br>JD18]              | 198  | - | 100.00% | 3.00E-4 |
|     |                    |                                                                          |      |   |         | 0       |
| 89  | QYC52776.1         | hypothetical protein [Klebsiella phage<br>vB_KpnM_TU02]                  | 321  | - | 99.06%  | 6.00E-7 |
|     |                    |                                                                          |      |   |         | 3       |
| 90  | AUV57433.1         | hypothetical protein [Klebsiella phage KP1]                              | 336  | - | 99.10%  | 3.00E-7 |
|     |                    |                                                                          |      |   |         | 4       |
| 91  | YP_0091906<br>59.1 | hypothetical protein AU097_gp078 [Klebsiella phage<br>JD18]              | 426  | - | 100.00% | 6.00E-1 |
|     |                    |                                                                          |      |   |         | 00      |
| 92  | UMM76580.<br>1     | hypothetical protein [Klebsiella phage UTI-K1]                           | 147  | - | 95.83%  | 3.00E-2 |
|     |                    |                                                                          |      |   |         | 5       |
| 93  | AUV57436.1         | thioredoxin [Klebsiella phage KP1]                                       | 978  | - | 99.69%  | 0.00E+  |
|     |                    |                                                                          |      |   |         | 00      |
| 94  | UMM76582.<br>1     | hypothetical protein [Klebsiella phage UTI-K1]                           | 216  | - | 98.59%  | 1.00E-4 |
|     |                    |                                                                          |      |   |         | 2       |
| 95  | UMM76583.<br>1     | hypothetical protein [Klebsiella phage UTI-K1]                           | 216  | - | 98.59%  | 1.00E-4 |
|     |                    |                                                                          |      |   |         | 2       |
| 96  | CAD227253<br>5.1   | thioredoxin, phage-associated [Klebsiella phage<br>vB_KpnM_311F]         | 1011 | - | 99.40%  | 0.00E+  |
|     |                    |                                                                          |      |   |         | 00      |
| 97  | QYC52785.1         | hypothetical protein [Klebsiella phage<br>vB_KpnM_TU02]                  | 219  | - | 100.00% | 6.00E-4 |
|     |                    |                                                                          |      |   |         | 6       |
| 98  | AUV57441.1         | hypothetical protein [Klebsiella phage KP1]                              | 192  | - | 100.00% | 4.00E-3 |
|     |                    |                                                                          |      |   |         | 7       |
| 99  | UMM76587.<br>1     | hypothetical protein [Klebsiella phage UTI-K1]                           | 222  | - | 98.63%  | 1.00E-4 |
|     |                    |                                                                          |      |   |         | 4       |
| 100 | QYC52787.1         | hypothetical protein [Klebsiella phage<br>vB_KpnM_TU02]                  | 582  | - | 98.96%  | 7.00E-1 |
|     |                    |                                                                          |      |   |         | 38      |
| 101 | YP_0091906<br>68.1 | hypothetical protein AU097_gp087 [Klebsiella phage<br>JD18]              | 492  | - | 99.39%  | 1.00E-8 |
|     |                    |                                                                          |      |   |         | 9       |
| 102 | AUV57445.1         | hypothetical protein [Klebsiella phage KP1]                              | 222  | - | 98.63%  | 2.00E-4 |
|     |                    |                                                                          |      |   |         | 4       |
| 103 | AUV57446.1         | pothetical protein [Klebsiella phage KP1]                                | 192  | - | 98.41%  | 4.00E-3 |
|     |                    |                                                                          |      |   |         | 6       |
| 104 | QBA85021.1         | putative zinc-finger containing protein [Klebsiella<br>phage vB_KpnM_GF] | 267  | - | 98.86%  | 3.00E-5 |
|     |                    |                                                                          |      |   |         | 7       |
| 105 | QYC52793.1         | hypothetical protein [Klebsiella phage<br>vB_KpnM_TU02]                  | 489  | - | 100.00% | 2.00E-1 |
|     |                    |                                                                          |      |   |         | 02      |
| 106 | QBA85022.1         | hypothetical protein [Klebsiella phage<br>vB_KpnM_GF]                    | 387  | - | 99.22%  | 6.00E-8 |
|     |                    |                                                                          |      |   |         | 8       |
| 107 | YP_0098367<br>19.1 | hypothetical protein HWB49_gp035 [Klebsiella<br>phage vB_Kpn_F48]        | 213  | - | 100.00% | 3.00E-4 |
|     |                    |                                                                          |      |   |         | 2       |
| 108 | UNY40912.1         | hypothetical protein [Klebsiella phage KP182]                            | 384  | - | 99.21%  | 2.00E-8 |
|     |                    |                                                                          |      |   |         | 7       |
| 109 | UCR74319.1         | hypothetical protein [Klebsiella phage]                                  | 135  | - | 97.44%  | 3.00E-0 |

|     |                |                                                                   |     |   |         |           |
|-----|----------------|-------------------------------------------------------------------|-----|---|---------|-----------|
|     |                | vB_KpnM_5N]                                                       |     |   |         | 8         |
| 110 | QEG11812.1     | hypothetical protein KPN6_208 [Klebsiella phage KPN6]             | 195 | - | 100.00% | 2.00E-40  |
| 111 | QYC52800.1     | thymidine kinase [Klebsiella phage vB_KpnM_TU02]                  | 600 | - | 99.50%  | 2.00E-145 |
| 112 | YP_010096085.1 | hypothetical protein KNT92_gp110 [Klebsiella phage Mineola]       | 168 | - | 98.18%  | 1.00E-30  |
| 113 | QBA85025.1     | hypothetical protein [Klebsiella phage vB_KpnM_GF]                | 468 | - | 98.71%  | 1.00E-108 |
| 114 | QEG11530.1     | hypothetical protein KMI13_199 [Klebsiella phage KMI13]           | 222 | - | 100.00% | 7.00E-47  |
| 115 | QGF21531.1     | hypothetical protein JIPhKp122_0099 [Klebsiella phage JIPh_Kp122] | 321 | - | 98.11%  | 2.00E-69  |
| 116 | QYC52805.1     | hypothetical protein [Klebsiella phage vB_KpnM_TU02]              | 546 | - | 98.90%  | 1.00E-128 |
| 117 | UWI30169.1     | endoribonuclease [Bacteriophage sp.]                              | 459 | - | 99.34%  | 1.00E-106 |
| 118 | QEG11534.1     | hypothetical protein KMI13_203 [Klebsiella phage KMI13]           | 276 | - | 98.90%  | 2.00E-59  |
| 119 | QBZ70935.1     | pyruvate formate-lyase [Shigella phage SSE1]                      | 363 | - | 84.17%  | 3.00E-67  |
| 120 | UNY40924.1     | hypothetical protein [Klebsiella phage KP182]                     | 345 | - | 95.61%  | 4.00E-77  |
| 121 | AUV57466.1     | hypothetical protein [Klebsiella phage KP1]                       | 312 | - | 98.06%  | 4.00E-68  |
| 122 | QYC52812.1     | hypothetical protein [Klebsiella phage vB_KpnM_TU02]              | 306 | - | 100.00% | 2.00E-68  |
| 123 | QEG10893.1     | hypothetical protein KMI11_122 [Klebsiella phage KMI11]           | 573 | - | 99.47%  | 2.00E-133 |
| 124 | YP_010096096.1 | hypothetical protein KNT92_gp121 [Klebsiella phage Mineola]       | 480 | - | 98.74%  | 7.00E-111 |
| 125 | QEG11682.1     | baseplate hub + tail lysozyme [Klebsiella phage KPN6]             | 495 | - | 99.39%  | 5.00E-101 |
| 126 | YP_009288804.1 | NUDIX hydrolase [Klebsiella phage vB_KpnM_KpV477]                 | 453 | - | 99.32%  | 3.00E-107 |
| 127 | UMM76903.1     | hypothetical protein [Klebsiella phage UTI-K4]                    | 237 | - | 98.72%  | 3.00E-48  |
| 128 | UMM76616.1     | hypothetical protein [Klebsiella phage UTI-K1]                    | 159 | - | 100.00% | 4.00E-16  |
| 129 | QLF83001.1     | hypothetical protein KpnM6E1_gp118 [Klebsiella phage KpnM6E1]     | 561 | - | 98.39%  | 2.00E-15  |
| 130 | UJP30322.1     | hypothetical protein [Klebsiella phage Kpn6N]                     | 594 | - | 92.39%  | 3.00E-126 |
| 131 | UGO53286.1     | hypothetical protein NISPERO_110 [Klebsiella                      | 228 | - | 97.33%  | 1.00E-4   |

|     |                |                                                                       |      |   |         |         |
|-----|----------------|-----------------------------------------------------------------------|------|---|---------|---------|
|     |                | phage vB_KaeM_Nispero]                                                |      |   |         | 4       |
| 132 | UMM76910.1     | hypothetical protein [Klebsiella phage UTI-K4]                        | 234  | - | 98.70%  | 3.00E-4 |
|     | 1              |                                                                       |      |   |         | 8       |
| 133 | UMM76623.1     | hypothetical protein [Klebsiella phage UTI-K1]                        | 291  | - | 98.96%  | 1.00E-5 |
|     | 1              |                                                                       |      |   |         | 0       |
| 134 | QYC52830.1     | hypothetical protein [Klebsiella phage vB_KpnM_TU02]                  | 129  | - | 95.24%  | 2.00E-1 |
|     |                |                                                                       |      |   |         | 9       |
| 135 | UYE90674.1     | hypothetical protein CPT_pKp20_142 [Klebsiella phage pKp20]           | 450  | - | 99.33%  | 1.00E-9 |
|     |                |                                                                       |      |   |         | 8       |
| 136 | UMM76627.1     | hypothetical protein [Klebsiella phage UTI-K1]                        | 558  | - | 97.84%  | 9.00E-1 |
|     | 1              |                                                                       |      |   |         | 34      |
| 137 | YP_010096113.1 | hypothetical protein KNT92_gp273 [Klebsiella phage Mineola]           | 225  | - | 100.00% | 2.00E-4 |
|     |                |                                                                       |      |   |         | 4       |
| 138 | QQM14391.1     | hypothetical protein [Klebsiella phage vB_KpnM_17-11]                 | 231  | - | 98.68%  | 8.00E-4 |
|     | 1              |                                                                       |      |   |         | 8       |
| 139 | QEG11558.1     | hypothetical protein KMI13_227 [Klebsiella phage KMI13]               | 369  | - | 99.18%  | 3.00E-8 |
|     |                |                                                                       |      |   |         | 5       |
| 140 | UJP30333.1     | hypothetical protein [Klebsiella phage Kpn6N]                         | 153  | - | 98.00%  | 2.00E-2 |
|     |                |                                                                       |      |   |         | 6       |
| 141 | USL86966.1     | hypothetical protein [Salmonella phage PSE-D1]                        | 141  | + | 100.00% | 2.00E-2 |
|     |                |                                                                       |      |   |         | 3       |
| 142 | UMM76632.1     | hypothetical protein [Klebsiella phage UTI-K1]                        | 351  | - | 98.28%  | 1.00E-7 |
|     | 1              |                                                                       |      |   |         | 8       |
| 143 | AUV57490.1     | hypothetical protein [Klebsiella phage KP1]                           | 186  | - | 98.36%  | 7.00E-3 |
|     |                |                                                                       |      |   |         | 7       |
| 144 | QQM14386.1     | hypothetical protein [Klebsiella phage vB_KpnM_17-11]                 | 180  | - | 96.61%  | 1.00E-0 |
|     | 1              |                                                                       |      |   |         | 9       |
| 145 | YP_009190717.1 | hypothetical protein AU097_gp136 [Klebsiella phage JD18]              | 180  | - | 100.00% | 8.00E-2 |
|     |                |                                                                       |      |   |         | 3       |
| 146 | YP_009190718.1 | hypothetical protein AU097_gp137 [Klebsiella phage JD18]              | 456  | - | 100.00% | 1.00E-1 |
|     |                |                                                                       |      |   |         | 08      |
| 147 | UCR74357.1     | hypothetical protein [Klebsiella phage vB_KpnM_5N]                    | 237  | - | 98.44%  | 4.00E-3 |
|     |                |                                                                       |      |   |         | 4       |
| 148 | YP_009190720.1 | deoxynucleoside monophosphate kinase [Klebsiella phage JD18]          | 738  | - | 100.00% | 9.00E-1 |
|     |                |                                                                       |      |   |         | 80      |
| 149 | YP_010098538.1 | tail completion protein [Klebsiella phage KP179]                      | 603  | - | 99.50%  | 4.00E-1 |
|     |                |                                                                       |      |   |         | 48      |
| 150 | ULA52389.1     | DNA end protector during packaging [Enterobacter phage vB-EclM_KMB19] | 828  | - | 77.26%  | 3.00E-1 |
|     |                |                                                                       |      |   |         | 59      |
| 151 | YP_009289410.1 | head completion protein [Klebsiella phage PKO111]                     | 450  | - | 99.33%  | 6.00E-1 |
|     |                |                                                                       |      |   |         | 06      |
| 152 | YP_009289411.1 | baseplate wedge protein 53 [Klebsiella phage PKO111]                  | 639  | + | 100.00% | 2.00E-1 |
|     |                |                                                                       |      |   |         | 55      |
| 153 | AUV57501.1     | baseplate hub + tail lysozyme [Klebsiella phage KP1]                  | 1731 | + | 99.48%  | 0.00E+  |

|     |                |                                                                            |      |   |         |           |
|-----|----------------|----------------------------------------------------------------------------|------|---|---------|-----------|
|     |                |                                                                            |      |   |         | 00        |
| 154 | QQM14371.1     | hypothetical protein [Klebsiella phage vB_KpnM_17-11]                      | 504  | + | 99.40%  | 2.00E-107 |
| 155 | QBP35495.1     | phospholipase [Phage NC-G]                                                 | 294  | + | 82.29%  | 2.00E-51  |
| 156 | UNY41240.1     | baseplate wedge subunit [Klebsiella phage KP185]                           | 1968 | + | 99.69%  | 0.00E+00  |
| 157 | AUV57505.1     | baseplate wedge initiator [Klebsiella phage KP1]                           | 3099 | + | 99.90%  | 0.00E+00  |
| 158 | YP_009190730.1 | baseplate wedge subunit [Klebsiella phage JD18]                            | 1026 | + | 99.69%  | 0.00E+00  |
| 159 | AUV57507.1     | baseplate wedge tail fiber connector [Klebsiella phage KP1]                | 912  | + | 99.67%  | 0.00E+00  |
| 160 | CAD5242911.1   | phage baseplate wedge [Klebsiella phage vB_KoM-Flushed]                    | 1824 | + | 99.84%  | 0.00E+00  |
| 161 | YP_009289420.1 | baseplate wedge subunit and tail pin [Klebsiella phage PKO111]             | 672  | + | 99.55%  | 2.00E-164 |
| 162 | QBA85042.1     | straight tail fiber [Klebsiella phage vB_KpnM_GF]                          | 1347 | + | 99.11%  | 0.00E+00  |
| 163 | QLF83037.1     | neck whiskers protein [Klebsiella phage KpnM6E1]                           | 1767 | + | 98.81%  | 0.00E+00  |
| 164 | QGF21582.1     | head completion, neck hetero-dimeric protein [Klebsiella phage JIPh_Kp122] | 942  | + | 99.36%  | 0.00E+00  |
| 165 | QFR57189.1     | head completion, neck hetero-dimeric protein [Klebsiella phage AmPh_EK29]  | 777  | + | 76.36%  | 6.00E-144 |
| 166 | QGF21584.1     | proximal tail sheath stabilization protein [Klebsiella phage JIPh_Kp122]   | 825  | + | 99.64%  | 0.00E+00  |
| 167 | UGO48513.1     | terminase small subunit [Klebsiella phage vB_KaeM_Boboto]                  | 510  | + | 99.41%  | 3.00E-107 |
| 168 | QPB08858.1     | terminase large subunit [Klebsiella phage Metamorpho]                      | 1839 | + | 98.20%  | 0.00E+00  |
| 169 | QGF21587.1     | tail sheath monomer [Klebsiella phage JIPh_Kp122]                          | 1974 | + | 99.24%  | 0.00E+00  |
| 170 | YP_009836926.1 | tail protein [Klebsiella phage vB_Kpn_F48]                                 | 492  | + | 86.42%  | 6.00E-95  |
| 171 | AUV57519.1     | portal vertex of the head [Klebsiella phage KP1]                           | 1569 | + | 99.81%  | 0.00E+00  |
| 172 | CAD2273129.1   | prohead core protein [Klebsiella phage vB_KpnM_311F]                       | 219  | + | 100.00% | 2.00E-22  |
| 173 | QGF21591.1     | capsid and scaffold protein [Klebsiella phage JIPh_Kp122]                  | 426  | + | 100.00% | 3.00E-81  |
| 174 | QGT55407.1     | prohead assembly (scaffolding) protein [Escherichia phage FP43]            | 651  | + | 82.08%  | 1.00E-119 |
| 175 | AUV57523.1     | prohead assembly (scaffolding) protein [Klebsiella                         | 813  | + | 99.63%  | 2.00E-1   |



|     |                 |                                                                     |      |   |         |           |
|-----|-----------------|---------------------------------------------------------------------|------|---|---------|-----------|
|     |                 | phage KP1]                                                          |      |   |         | 50        |
| 176 | AUV57524.1      | major capsid protein [Klebsiella phage KP1]                         | 1560 | + | 100.00% | 0.00E+00  |
| 177 | QGF21595.1      | capsid vertex [Klebsiella phage JIPh_Kp122]                         | 1281 | + | 99.77%  | 0.00E+00  |
| 178 | AUV57526.1      | hypothetical protein [Klebsiella phage KP1]                         | 549  | - | 99.45%  | 8.00E-131 |
| 179 | UJP30097.1      | RNA ligase [Klebsiella phage Kpn6N]                                 | 1008 | - | 97.91%  | 0.00E+00  |
| 180 | UNY41265.1      | hypothetical protein [Klebsiella phage KP185]                       | 258  | - | 97.65%  | 1.00E-54  |
| 181 | UMM76959.1      | hypothetical protein [Klebsiella phage UTI-K4]                      | 327  | - | 97.22%  | 8.00E-71  |
| 182 | QEG11348.1      | hypothetical protein KMI13_17 [Klebsiella phage KMI13]              | 228  | - | 100.00% | 4.00E-46  |
| 183 | UMM76677.1      | capsid and scaffold protein [Klebsiella phage UTI-K1]               | 1125 | - | 96.79%  | 0.00E+00  |
| 184 | QBA85052.1      | inhibitor of prohead protease [Klebsiella phage vB_KpnM_GF]         | 795  | - | 100.00% | 4.00E-177 |
| 185 | UYE90726.1      | DNA helicase [Klebsiella phage pKp20]                               | 1503 | + | 98.60%  | 0.00E+00  |
| 186 | YP_0100771.74.1 | homing endonuclease [Yersinia phage PYPS2T]                         | 681  | + | 69.78%  | 1.00E-107 |
| 187 | QBA85054.1      | DNA helicase [Klebsiella phage vB_KpnM_GF]                          | 243  | + | 98.53%  | 8.00E-40  |
| 188 | UKS71665.1      | hypothetical protein FRZ284_00073 [Klebsiella phage vB_KpnM_FRZ284] | 168  | - | 97.50%  | 9.00E-20  |
| 189 | YP_0098369.06.1 | single stranded DNA-binding protein [Klebsiella phage vB_Kpn_F48]   | 417  | - | 78.99%  | 2.00E-65  |
| 190 | UOK17800.1      | baseplate wedge subunit [Klebsiella phage KP1079]                   | 411  | - | 97.79%  | 9.00E-91  |
| 191 | YP_0098369.04.1 | baseplate hub assembly chaperone [Klebsiella phage vB_Kpn_F48]      | 630  | - | 63.11%  | 1.00E-92  |
| 192 | QGF21609.1      | baseplate [Klebsiella phage JIPh_Kp122]                             | 759  | + | 99.60%  | 0.00E+00  |
| 193 | YP_0091907.64.1 | baseplate hub subunit [Klebsiella phage JD18]                       | 1143 | + | 100.00% | 0.00E+00  |
| 194 | UNY41278.1      | baseplate hub [Klebsiella phage KP185]                              | 528  | + | 99.43%  | 2.00E-122 |
| 195 | CAD524310.9.1   | baseplate hub [Klebsiella phage vB_KpM-Wobble]                      | 1734 | + | 99.65%  | 0.00E+00  |
| 196 | QYC52894.1      | baseplate tail tube cap [Klebsiella phage vB_KpnM_TU02]             | 1053 | + | 99.71%  | 0.00E+00  |
| 197 | QOI66406.1      | tail assembly protein [Erwinia phage FBB1]                          | 927  | + | 71.89%  | 8.00E-1   |

|     |                    |                                                                      |      |   |         |              |    |
|-----|--------------------|----------------------------------------------------------------------|------|---|---------|--------------|----|
|     |                    |                                                                      |      |   |         |              | 48 |
| 198 | YP_0100961<br>75.1 | hypothetical protein KNT92_gp211 [Klebsiella phage<br>Mineola]       | 279  | - | 100.00% | 9.00E-6      | 0  |
| 199 | QLF83072.1         | RNA polymerase ADP-ribosylase [Klebsiella phage<br>KpnM6E1]          | 2127 | - | 99.86%  | 0.00E+<br>00 |    |
| 200 | UNY41284.1         | hypothetical protein [Klebsiella phage KP185]                        | 180  | - | 98.31%  | 1.00E-3      | 2  |
| 201 | YP_0091907<br>72.1 | DNA ligase [Klebsiella phage JD18]                                   | 1473 | - | 99.80%  | 0.00E+<br>00 |    |
| 202 | UJP30119.1         | hypothetical protein [Klebsiella phage Kpn6N]                        | 207  | - | 97.06%  | 9.00E-4      | 3  |
| 203 | UYE90743.1         | hypothetical protein CPT_pKp20_224 [Klebsiella<br>phage pKp20]       | 843  | - | 99.64%  | 0.00E+<br>00 |    |
| 204 | UNY41013.1         | hypothetical protein [Klebsiella phage KP182]                        | 201  | - | 96.97%  | 3.00E-4      | 0  |
| 205 | QEG10809.1         | hypothetical protein KMI11_38 [Klebsiella phage<br>KMI11]            | 171  | - | 98.21%  | 3.00E-3      | 2  |
| 206 | UMM76699.<br>1     | hypothetical protein [Klebsiella phage UTI-K1]                       | 279  | - | 98.91%  | 4.00E-5      | 9  |
| 207 | AUV57554.1         | hypothetical protein [Klebsiella phage KP1]                          | 489  | - | 94.44%  | 1.00E-9      | 6  |
| 208 | QYC52907.1         | hypothetical protein [Klebsiella phage<br>vB_KpnM_TU02]              | 360  | - | 99.16%  | 4.00E-8      | 2  |
| 209 | UMM76986.<br>1     | hypothetical protein [Klebsiella phage UTI-K4]                       | 513  | - | 100.00% | 4.00E-1      | 11 |
| 210 | QQM14318.<br>1     | hypothetical protein [Klebsiella phage<br>vB_KpnM_17-11]             | 369  | - | 98.36%  | 5.00E-8      | 5  |
| 211 | YP_0092895<br>79.1 | hypothetical protein BI014_gp178 [Klebsiella phage<br>PKO111]        | 207  | - | 98.53%  | 1.00E-3      | 8  |
| 212 | ULA52450.1         | rIII lysis inhibitor accessory [Enterobacter phage<br>vB-EclM_KMB19] | 249  | - | 79.27%  | 9.00E-4      | 0  |
| 213 | ULA52451.1         | capsid assembly chaperone [Enterobacter phage<br>vB-EclM_KMB19]      | 324  | - | 75.47%  | 1.00E-5      | 2  |
| 214 | QPB08810.1         | tail fiber protein [Klebsiella phage Metamorpho]                     | 309  | - | 97.06%  | 5.00E-6      | 7  |
| 215 | AUV57563.1         | hypothetical protein [Klebsiella phage KP1]                          | 201  | - | 100.00% | 4.00E-3      | 8  |
| 216 | YP_0092895<br>75.1 | deoxycytidylate deaminase [Klebsiella phage<br>PKO111]               | 570  | - | 99.47%  | 2.00E-1      | 37 |
| 217 | UGO49585.1         | hypothetical protein MERCI_123 [Klebsiella phage<br>vB_KaeM_Merci]   | 345  | - | 93.86%  | 3.00E-7      | 3  |
| 218 | YP_0092895<br>73.1 | hypothetical protein BI014_gp172 [Klebsiella phage<br>PKO111]        | 237  | - | 98.72%  | 9.00E-5      | 0  |
| 219 | QYC52921.1         | hypothetical protein [Klebsiella phage]                              | 285  | - | 98.94%  | 9.00E-6      |    |

|     |                 |                                                                            |      |   |         |           |
|-----|-----------------|----------------------------------------------------------------------------|------|---|---------|-----------|
|     |                 | vB_KpnM_TU02]                                                              |      |   |         | 2         |
| 220 | QBA85065.1      | 3'-phosphatase, 5'-polynucleotide kinase [Klebsiella phage vB_KpnM_GF]     | 894  | - | 100.00% | 0.00E+00  |
| 221 | UMM76998.1      | hypothetical protein [Klebsiella phage UTI-K4]                             | 213  | - | 97.14%  | 1.00E-42  |
| 222 | YP_0100984.67.1 | outer membrane lipoprotein [Klebsiella phage KP179]                        | 288  | - | 97.89%  | 5.00E-63  |
| 223 | QGF21640.1      | spanin Rz [Klebsiella phage JIPh_Kp122]                                    | 354  | - | 98.29%  | 2.00E-77  |
| 224 | QPB08801.1      | Alc-like transcription inhibitor [Klebsiella phage Metamorpho]             | 510  | - | 98.22%  | 4.00E-112 |
| 225 | QLF83100.1      | RNA ligase [Klebsiella phage KpnM6E1]                                      | 1152 | - | 99.19%  | 0.00E+00  |
| 226 | QQM14302.1      | endonuclease [Klebsiella phage vB_KpnM_17-11]                              | 417  | - | 98.55%  | 2.00E-95  |
| 227 | QEG11614.1      | ribonucleotide reductase of class Ia [Klebsiella phage KPN6]               | 1143 | - | 99.47%  | 0.00E+00  |
| 228 | YP_0091908.01.1 | ribonucleoside-diphosphate reductase subunit alpha [Klebsiella phage JD18] | 2247 | - | 100.00% | 0.00E+00  |
| 229 | UCR74167.1      | hypothetical protein [Klebsiella phage vB_KpnM_5N]                         | 207  | - | 91.18%  | 2.00E-38  |
| 230 | AUV57581.1      | thymidylate synthase [Klebsiella phage KP1]                                | 876  | - | 98.63%  | 0.00E+00  |
| 231 | YP_0091908.05.1 | hypothetical protein AU097_gp224 [Klebsiella phage JD18]                   | 318  | - | 99.05%  | 3.00E-71  |
| 232 | YP_0091908.06.1 | dihydrofolate reductase [Klebsiella phage JD18]                            | 600  | - | 97.99%  | 3.00E-143 |
| 233 | YP_0100984.55.1 | hypothetical protein KNU12_gp015 [Klebsiella phage KP179]                  | 321  | - | 96.23%  | 3.00E-70  |
| 234 | UOK17848.1      | hypothetical protein KP1079_00242 [Klebsiella phage KP1079]                | 279  | - | 98.75%  | 2.00E-51  |
| 235 | QEG11714.1      | hypothetical protein KPN6_71 [Klebsiella phage KPN6]                       | 279  | - | 98.91%  | 1.00E-58  |
| 236 | YP_0091908.11.1 | hypothetical protein AU097_gp230 [Klebsiella phage JD18]                   | 222  | - | 98.63%  | 3.00E-45  |
| 237 | UJP30156.1      | hypothetical protein [Klebsiella phage Kpn6N]                              | 258  | - | 98.82%  | 5.00E-54  |
| 238 | QEG11081.1      | single-stranded DNA-binding protein [Klebsiella phage KMI12]               | 918  | - | 99.66%  | 2.00E-174 |
| 239 | UGO53394.1      | homing endonuclease [Klebsiella phage vB_KaeM_Nispero]                     | 663  | - | 99.09%  | 1.00E-163 |
| 240 | QPB08784.1      | DNA helicase loader [Klebsiella phage Metamorpho]                          | 663  | - | 99.52%  | 3.00E-148 |
| 241 | UMM77020.       | transcriptional regulator [Klebsiella phage UTI-K4]                        | 300  | - | 98.99%  | 1.00E-6   |

|     |                |                                                                        |      |   |         |           |
|-----|----------------|------------------------------------------------------------------------|------|---|---------|-----------|
|     | 1              |                                                                        |      |   |         | 4         |
| 242 | UYE90783.1     | double-stranded DNA binding protein [Klebsiella phage pKp20]           | 273  | - | 98.89%  | 9.00E-5   |
|     |                |                                                                        |      |   |         | 6         |
| 243 | UMM76742.1     | ribonuclease H [Klebsiella phage UTI-K1]                               | 927  | - | 99.35%  | 0.00E+00  |
|     |                |                                                                        |      |   |         | 00        |
| 244 | AUV57596.1     | long tail fiber proximal subunit [Klebsiella phage KP1]                | 3846 | + | 98.52%  | 0.00E+00  |
|     |                |                                                                        |      |   |         | 00        |
| 245 | YP_010089575.1 | tail connector protein [Klebsiella phage KPV15]                        | 1137 | + | 97.88%  | 0.00E+00  |
|     |                |                                                                        |      |   |         | 00        |
| 246 | UMM76745.1     | tail fibers protein [Klebsiella phage UTI-K1]                          | 693  | + | 97.83%  | 3.00E-138 |
|     |                |                                                                        |      |   |         | 38        |
| 247 | UGO48321.1     | hypothetical protein SHINKOU_259 [Klebsiella phage vB_KaeM_Shinkou]    | 4173 | + | 79.11%  | 0.00E+00  |
|     |                |                                                                        |      |   |         | 00        |
| 248 | YP_009190822.1 | hypothetical protein AU097_gp241 [Klebsiella phage JD18]               | 405  | + | 99.25%  | 5.00E-84  |
|     |                |                                                                        |      |   |         | 4         |
| 249 | YP_009289543.1 | holin [Klebsiella phage PKO111]                                        | 657  | + | 98.17%  | 6.00E-141 |
|     |                |                                                                        |      |   |         | 41        |
| 250 | UJP30168.1     | anti-sigma factor [Klebsiella phage Kpn6N]                             | 273  | - | 98.89%  | 6.00E-57  |
|     |                |                                                                        |      |   |         | 7         |
| 251 | QEG11765.1     | hypothetical protein KPN6_86 [Klebsiella phage KPN6]                   | 267  | - | 98.86%  | 1.00E-57  |
|     |                |                                                                        |      |   |         | 7         |
| 252 | AUV57604.1     | hypothetical protein [Klebsiella phage KP1]                            | 327  | - | 100.00% | 1.00E-72  |
|     |                |                                                                        |      |   |         | 2         |
| 253 | QYC52955.1     | hypothetical protein [Klebsiella phage vB_KpnM_TU02]                   | 279  | - | 98.91%  | 1.00E-61  |
|     |                |                                                                        |      |   |         | 1         |
| 254 | YP_009190828.1 | hypothetical protein AU097_gp247 [Klebsiella phage JD18]               | 126  | - | 100.00% | 4.00E-19  |
|     |                |                                                                        |      |   |         | 9         |
| 255 | YP_010098694.1 | anti-restriction nuclease [Klebsiella phage KP179]                     | 303  | - | 98.00%  | 2.00E-65  |
|     |                |                                                                        |      |   |         | 5         |
| 256 | UNY41062.1     | anti-restriction nuclease [Klebsiella phage KP182]                     | 426  | - | 99.29%  | 2.00E-101 |
|     |                |                                                                        |      |   |         | 01        |
| 257 | UGO53412.1     | anti-restriction nuclease [Klebsiella phage vB_KaeM_Nispero]           | 342  | - | 97.35%  | 3.00E-76  |
|     |                |                                                                        |      |   |         | 6         |
| 258 | QEG11407.1     | transcriptional regulator of middle promoters [Klebsiella phage KMI13] | 645  | - | 97.66%  | 8.00E-149 |
|     |                |                                                                        |      |   |         | 49        |
| 259 | UNY41346.1     | hypothetical protein [Klebsiella phage KP185]                          | 264  | - | 98.85%  | 5.00E-56  |
|     |                |                                                                        |      |   |         | 6         |
| 260 | YP_009190835.1 | DNA topoisomerase [Klebsiella phage JD18]                              | 1389 | - | 100.00% | 0.00E+00  |
|     |                |                                                                        |      |   |         | 00        |
| 261 | YP_010096245.1 | hypothetical protein KNT92_gp141 [Klebsiella phage Mineola]            | 156  | - | 100.00% | 3.00E-27  |
|     |                |                                                                        |      |   |         | 7         |
| 262 | AUV57616.1     | hypothetical protein [Klebsiella phage KP1]                            | 456  | - | 100.00% | 5.00E-108 |
|     |                |                                                                        |      |   |         | 08        |
| 263 | YP_0100962     | hypothetical protein KNT92_gp139 [Klebsiella phage                     | 192  | - | 98.41%  | 1.00E-3   |

|     |            |                                                          |     |   |         |         |
|-----|------------|----------------------------------------------------------|-----|---|---------|---------|
|     | 47.1       | Mineola]                                                 |     |   |         | 5       |
| 264 | YP_0091908 | hypothetical protein AU097_gp259 [Klebsiella phage JD18] | 117 | - | 100.00% | 7.00E-1 |
|     | 40.1       |                                                          |     |   |         | 6       |
| 265 | YP_0091908 | hypothetical protein AU097_gp260 [Klebsiella phage JD18] | 240 | - | 98.73%  | 3.00E-4 |
|     | 41.1       |                                                          |     |   |         | 9       |
| 266 | YP_0091908 | hypothetical protein AU097_gp261 [Klebsiella phage JD18] | 168 | - | 100.00% | 6.00E-3 |
|     | 42.1       |                                                          |     |   |         | 1       |

**Table S2.** CDS function prediction of phage PST-H1.

| C<br>DS | Hit_name       | Hit_description                                              | Length<br>(aa) | Strand | Identity<br>(%) | Value     |
|---------|----------------|--------------------------------------------------------------|----------------|--------|-----------------|-----------|
| 1       | QIG57273.1     | tail fiber protein [Salmonella phage vB_SpuP_Spp11]          | 2559           | -      | 99.53%          | 0.00E+00  |
| 2       | YP_008859651.1 | hypothetical protein SPSV3_gp29 [Salmonella phage SETP3]     | 366            | -      | 100.00%         | 2.00E-85  |
| 3       | ALN97486.1     | hypothetical protein [Salmonella phage fSE1C]                | 516            | -      | 99.42%          | 2.00E-121 |
| 4       | UJP30006.1     | hypothetical protein [Salmonella phage CKT1]                 | 444            | -      | 100.00%         | 3.00E-105 |
| 5       | UJP30007.1     | tail tape measure [Salmonella phage CKT1]                    | 2334           | -      | 99.61%          | 0.00E+00  |
| 6       | UJP30008.1     | hypothetical protein [Salmonella phage CKT1]                 | 360            | -      | 100.00%         | 4.00E-83  |
| 7       | UHM94159.1     | hypothetical protein [Salmonella phage vB_SenS_TUMS_E19]     | 417            | -      | 98.55%          | 4.00E-96  |
| 8       | AXQ70283.1     | hypothetical protein vst10_25 [Salmonella virus VSt10]       | 180            | +      | 71.43%          | 5.00E-19  |
| 9       | QQK87850.1     | hypothetical protein [Salmonella phage SLMP1]                | 1140           | +      | 93.88%          | 0.00E+00  |
| 10      | DAL23253.1     | TPA_asm: MAG TPA_asm: homing endonuclease [Siphoviridae sp.] | 474            | +      | 100.00%         | 2.00E-76  |
| 11      | UKM96712.1     | hypothetical protein PBSE191_38 [Salmonella phage PBSE191]   | 231            | +      | 98.68%          | 3.00E-47  |
| 12      | UGC97872.1     | DNA-binding protein [Salmonella phage LP31]                  | 672            | +      | 98.21%          | 4.00E-161 |
| 13      | AXC39501.1     | hypothetical protein [Salmonella phage S100]                 | 1170           | -      | 99.49%          | 0.00E+00  |
| 14      | APU03010.1     | hypothetical protein LPSE_00055 [Salmonella phage LPSE1]     | 420            | -      | 98.56%          | 5.00E-96  |
| 15      | QDH44714.1     | hypothetical protein [Salmonella phage SF4]                  | 396            | -      | 98.47%          | 1.00E-72  |
| 16      | QIG57288.1     | hypothetical protein [Salmonella phage vB_SpuP_Spp11]        | 360            | -      | 96.64%          | 2.00E-76  |

|    |                |                                                                      |      |   |        |           |
|----|----------------|----------------------------------------------------------------------|------|---|--------|-----------|
| 17 | UJP30019.1     | hypothetical protein [Salmonella phage CKT1]                         | 606  | - | 97.51% | 9.00E-130 |
| 18 | QNI20459.1     | hypothetical protein SHWT1_30 [Salmonella phage SHWT1]               | 510  | - | 99.41% | 8.00E-119 |
| 19 | YP_001110840.1 | hypothetical protein SPSV3_gp13 [Salmonella phage SETP3]             | 189  | - | 96.77% | 9.00E-35  |
| 20 | APM00275.1     | neck whiskers protein [Salmonella phage STP03]                       | 351  | - | 97.41% | 5.00E-74  |
| 21 | UJP30024.1     | capsid and scaffold [Salmonella phage CKT1]                          | 288  | - | 96.84% | 2.00E-39  |
| 22 | UJP30025.1     | major capsid protein [Salmonella phage CKT1]                         | 1050 | - | 99.40% | 0.00E+00  |
| 23 | AFO70806.1     | hypothetical protein [Salmonella phage ST4]                          | 702  | - | 99.14% | 3.00E-127 |
| 24 | ASZ77968.1     | hypothetical protein [Salmonella phage ST3]                          | 390  | - | 98.45% | 6.00E-87  |
| 25 | ASZ77969.1     | hypothetical protein [Salmonella phage ST3]                          | 120  | - | 89.74% | 3.00E-16  |
| 26 | AXC39811.1     | neck whiskers protein [Salmonella phage S106]                        | 459  | - | 97.69% | 3.00E-85  |
| 27 | QNJ54499.1     | hypothetical protein [Salmonella phage UPWr_S5]                      | 1860 | - | 92.73% | 0.00E+00  |
| 28 | AXC39483.1     | hypothetical protein [Salmonella phage S100]                         | 654  | + | 93.55% | 2.00E-152 |
| 29 | QVQ56298.1     | 62 kDa structural protein [Salmonella phage JD01]                    | 1476 | - | 98.98% | 0.00E+00  |
| 30 | QIO03746.1     | terminase [Salmonella phage skrot]                                   | 1272 | - | 99.53% | 0.00E+00  |
| 31 | UJP30034.1     | hypothetical protein [Salmonella phage CKT1]                         | 507  | - | 92.26% | 7.00E-98  |
| 32 | UJP30036.1     | hypothetical protein [Salmonella phage CKT1]                         | 180  | - | 55.88% | 1.00E-04  |
| 33 | UMW88037.1     | hypothetical protein [Escherichia phage UTI-CM001]                   | 237  | - | 98.72% | 5.00E-49  |
| 34 | QQV88101.1     | hypothetical protein [Escherichia phage phiWAO78-1]                  | 222  | - | 90.74% | 4.00E-29  |
| 35 | QYC53070.1     | hypothetical protein [Salmonella phage vB_SalS_TU03]                 | 291  | - | 79.17% | 2.00E-14  |
| 36 | QYC53069.1     | hypothetical protein [Salmonella phage vB_SalS_TU03]                 | 177  | - | 66.67% | 7.00E-19  |
| 37 | QMS41844.1     | hypothetical protein S55_GM000032 [Salmonella phage S55]             | 156  | - | 96.08% | 2.00E-27  |
| 38 | YP_009620149.1 | hypothetical protein FDJ09_gp69 [Escherichia phage VB_EcoS-Golestan] | 150  | - | 95.92% | 4.00E-24  |

|    |                    |                                                                |      |   |         |               |
|----|--------------------|----------------------------------------------------------------|------|---|---------|---------------|
| 39 | QZI78493.1         | lysine [Escherichia phage vB_EcoS-22664BS2]                    | 492  | - | 89.44%  | 2.00E-6<br>7  |
| 40 | YP_0087670<br>59.1 | putative class I holin [Salmonella phage SETP13]               | 291  | - | 96.88%  | 7.00E-5<br>0  |
| 41 | YP_0011108<br>21.1 | hypothetical protein SPSV3_gp53 [Salmonella phage SETP3]       | 282  | - | 100.00% | 1.00E-6<br>0  |
| 42 | QQK87823.1         | hypothetical protein [Salmonella phage SLMP1]                  | 366  | - | 96.69%  | 3.00E-6<br>2  |
| 43 | APM00302.1         | hypothetical protein STP03_048 [Salmonella phage STP03]        | 204  | - | 92.54%  | 3.00E-4<br>0  |
| 44 | UJP30047.1         | hypothetical protein [Salmonella phage CKT1]                   | 402  | - | 100.00% | 4.00E-8<br>8  |
| 45 | QMS41853.1         | hypothetical protein S55_GM000041 [Salmonella phage S55]       | 165  | - | 100.00% | 4.00E-3<br>2  |
| 46 | UJP29985.1         | hypothetical protein [Salmonella phage CKT1]                   | 117  | - | 100.00% | 4.00E-1<br>8  |
| 47 | QNI20430.1         | hypothetical protein SHWT1_1 [Salmonella phage SHWT1]          | 171  | + | 98.21%  | 1.00E-3<br>2  |
| 48 | AFO70782.1         | hypothetical protein [Salmonella phage ST4]                    | 234  | + | 97.40%  | 3.00E-4<br>6  |
| 49 | QQK87829.1         | replicative DNA helicase [Salmonella phage SLMP1]              | 2187 | + | 98.76%  | 0.00E+<br>00  |
| 50 | AXC39658.1         | hypothetical protein [Salmonella phage S102]                   | 219  | - | 98.61%  | 2.00E-4<br>4  |
| 51 | UMO77768.<br>1     | 13.88 kDa late protein [Salmonella phage F118P13]              | 513  | + | 97.65%  | 4.00E-7<br>2  |
| 52 | UJP29992.1         | hypothetical protein [Salmonella phage CKT1]                   | 1437 | + | 96.83%  | 0.00E+<br>00  |
| 53 | UJP29993.1         | hypothetical protein [Salmonella phage CKT1]                   | 627  | + | 98.94%  | 1.00E-1<br>34 |
| 54 | UJP29994.1         | DNA polymerase I [Salmonella phage CKT1]                       | 2202 | + | 99.73%  | 0.00E+<br>00  |
| 55 | AXC39521.1         | hypothetical protein [Salmonella phage S100]                   | 132  | + | 88.37%  | 1.00E-1<br>6  |
| 56 | AWY03026.1         | hypothetical protein [Salmonella phage vB_SpuS_Sp4]            | 288  | + | 93.68%  | 2.00E-6<br>0  |
| 57 | YP_0070104<br>88.1 | hypothetical protein F491_gp35 [Salmonella phage vB_SenS-Ent1] | 192  | + | 100.00% | 1.00E-3<br>6  |
| 58 | UJP29999.1         | hypothetical protein [Salmonella phage CKT1]                   | 684  | + | 96.04%  | 2.00E-1<br>63 |
| 59 | UJP30000.1         | DNA helicase [Salmonella phage CKT1]                           | 1341 | + | 100.00% | 0.00E+<br>00  |
| 60 | UIW13727.1         | hypothetical protein [Salmonella phage vB_SalS-S10]            | 183  | + | 98.33%  | 1.00E-2<br>0  |

|    |            |                                              |     |   |        |               |
|----|------------|----------------------------------------------|-----|---|--------|---------------|
| 61 | QNI20443.1 | tail fibers protein [Salmonella phage SHWT1] | 735 | - | 96.70% | 5.00E-1<br>25 |
|----|------------|----------------------------------------------|-----|---|--------|---------------|

---
